### 33 **Abstract**

34 Zika virus (ZIKV) infection can cause developmental and neurological defects and represents  
35 a threat for human health. Type I/III interferon responses control ZIKV infection and  
36 pathological processes, yet the virus has evolved various mechanisms to defeat these host  
37 responses. Here, we established a pipeline to delineate at high-resolution the genetic evolution  
38 of ZIKV in a controlled host cell environment. We uncovered that serially passaged ZIKV  
39 acquired increased infectivity, defined as the probability for one virus to initiate infection, and  
40 simultaneously developed a resistance to TLR3-induced restriction. We built a mathematical  
41 model that suggests that the increased infectivity is due to a reduced time-lag between  
42 infection and viral replication. We found that this adaptation is cell-type specific, suggesting  
43 that different cell environments may drive viral evolution along different routes. Deep-  
44 sequencing of ZIKV quasi-species pinpointed mutations whose increased frequencies  
45 temporally coincide with the acquisition of the adapted phenotype. We functionally validated  
46 a point-mutation in ZIKV envelope (E) protein recapitulating the adapted phenotype. Its  
47 positioning on the E structure suggests a putative function in protein refolding/stability.  
48 Altogether, our results uncovered ZIKV adaptations to the cell environment leading to an  
49 accelerated replication onset coupled with resistance to TLR3-induced antiviral response. Our  
50 work provides insights into viral escape mechanisms and interactions with host cell and can  
51 serve as a framework to study other viruses.

52

### 53 **Significance Statement**

54 Zika virus poses a major threat to Human health worldwide. To understand how Zika virus  
55 interacts with human cells, we studied its evolution in cell cultures. We found that the viruses  
56 adapted by initiating their replication sooner after cell entry. We sequenced the genomes of  
57 the viruses evolved over time and found mutations underlying the adaptation of the virus. One  
58 mutation in the envelope viral protein is sufficient to reproduce the faster initiation of  
59 replication. Our multidisciplinary approach based on analyzing viral evolution in a controlled  
60 environment and mathematical modeling revealed how Zika virus can escape antiviral  
61 responses, and can serve as framework to study other viruses.

## 62 **Introduction**

63 Zika Virus (ZIKV; *Flaviviridae*) is a mosquito-borne human pathogen related to other  
64 globally relevant flaviviruses, including dengue, yellow fever, West Nile, Japanese  
65 encephalitis and tick-borne encephalitis viruses. As is typical for flaviviruses, ZIKV has a  
66 10.8 kb RNA genome of positive polarity, encoding a polyprotein composed of 3 structural  
67 proteins (C, prM and E) and 7 nonstructural (NS) proteins. The NS proteins are involved in  
68 the steps of RNA synthesis and assembly of viral particles. Several NS proteins of the  
69 flaviviruses interfere with host antiviral responses (1-4).

70

71 For decades, ZIKV infections were either unrecognized or occurred only sporadically and  
72 were associated with mild symptoms. However, ZIKV was detected in Brazil in 2015 and  
73 spread rapidly, reaching infection rates exceeding 50% (5). During the Brazilian ZIKV  
74 outbreak, congenital infections lead to fetal demise, microcephaly and other developmental  
75 abnormalities, *e.g.*, visual and hearing impairment, skeletal deformities, and Guillain–Barré  
76 syndrome in adults (5-9). Severe symptoms, including neural development defects and fetal  
77 demise, are linked to host antiviral responses by type I and III interferons (IFN-I/III), which  
78 are also central for ZIKV control and *in utero* transmission (10-15). All cells possess  
79 signaling pathways designed to trigger the production of IFN-I/III and IFN-stimulated genes  
80 (ISGs) upon viral infection. Their effects are potent and wide-ranging: direct inhibition of the  
81 viral life cycle at multiple steps and jumpstart of the adaptive immune response. These  
82 antiviral responses are induced by the recognition of specific viral motifs by host sensors  
83 (*e.g.*, Toll-like receptors) that mobilize cascade signaling. As for other flaviviruses, TLR3-  
84 induced signaling reduces ZIKV replication (16). Nonetheless, like virtually all human  
85 pathogenic viruses, ZIKA has evolved towards the ability to modulate and counteract the  
86 IFN-I/III signaling and other host responses (1-4) likely due to adapted interactions with host

87 proteins. The mutation rate of ZIKV is expected to be very high, *i.e.*, around  $10^{-4/-5}$  mutation  
88 per site per replication in accordance with other flaviviruses, since the catalytic site of the  
89 NS5 polymerase is well-conserved among flaviviruses (17). This mutation rate ensures a high  
90 genetic diversity and adaptability of viral populations. Adaptive mutations that improve the  
91 fitness of the virus can do so by improving the viral machinery, optimizing the interactions  
92 with proviral host factors, or inhibiting antiviral factors. Given the limited size of the viral  
93 genome, trade-offs between these three strategies, and how they play out in the human and  
94 mosquito hosts, are expected.

95

96 Previous studies on ZIKV evolution mainly focused on the ability of the virus to maintain  
97 robust replication in the context of alternate human/mosquito hosts (*e.g.*, (18)). Nonetheless,  
98 studies have demonstrated the ability of arboviruses, including ZIKV, to replicate and last for  
99 several months in a fraction of infected patients (*e.g.*, detection of viral genome in plasma,  
100 urine and semen) (19-24), further stressing out the need to better understand the possible  
101 outcome of viral evolution in the human host.

102

103 The molecular tracking of arboviral evolution in the host is greatly handicapped by the huge  
104 viral diversity due to the error-prone viral polymerase. To overcome this challenge, novel  
105 methods for accurate identification of ultra-rare and low-frequency genetic variants in RNA  
106 viruses have recently been developed. Especially, the CirSeq method has proved successful to  
107 analyze the viral genetic diversity of poliovirus, a viral model known for its high rate of  
108 replication (25), as well as the landscape of transcription errors in eukaryotic cells (26).

109

110 Here, we adapted this novel methodology to the arbovirus ZIKV, to reveal how it can adapt to  
111 the human host cell environment and to reveal the genetic interactions involved. We

112 conducted an in-depth analysis of the evolution of the viral quasi-species (*i.e.*, population of  
113 genomes isolated from infected cell supernatants) through serial passages of an epidemic  
114 ZIKV strain in human cell cultures. We uncovered a phenotypic change linked to higher viral  
115 spread, *via* increased specific infectivity, which was concomitantly acquired with viral  
116 resistance to TLR3-induced antiviral responses. Bioinformatic analyses showed that specific  
117 ZIKV variants increased in frequency in temporal association with this phenotypic adaptation,  
118 and the corresponding mutations were functionally validated.

119

## 120 **Results**

121

### 122 **Acquisition of increased specific infectivity during experimental evolution.**

123 To uncover the genetic interactions of ZIKV with the host cell environment, we performed  
124 experimental evolution in a human cell line. Huh7.5.1 cells were selected as they are a well-  
125 characterized cell line deficient for different antiviral sensors, thus offering a stable and well-  
126 controlled cell environment (27, 28). Experimental evolution was performed by serial  
127 passaging of ZIKV: at each passage, viral populations harvested at 3 days post-infection were  
128 used to infect naïve cells (**Fig. 1A**, schema on the left side). Quantification of infectious virus  
129 produced over the course of the experimental evolution showed that the viral production  
130 increased during serial viral passaging and reached a plateau by days 21-to-27 (**Fig. S1A**).  
131 The increased viral productions were observed for all 3 independent runs of experimental  
132 evolution and within a similar timeframe (**Fig. S1A**). Likewise, quantifications of intracellular  
133 and extracellular viral RNA levels confirmed the augmentation of ZIKV replication over time  
134 (**Fig. S1B**).

135

136 To address how passaged viral populations adapt to human host cell, we first studied their  
137 ability to initiate infection as compared to the parental virus by quantifying the specific  
138 infectivity, defined as the probability for one physical virion to initiate infection  
139 (determination described in Materials and Methods). We demonstrated an increase of the  
140 specific infectivity of the viral populations harvested in the course of all the independent runs  
141 of experimental evolution (**Fig. 1A**). The maximum level of specific infectivity was observed  
142 by days 21-to-24 in the independent runs of experimental evolutions followed by a plateau, as  
143 a likely consequence of viral adaptation to human cells reaching equilibrium. The trend of  
144 increased viral production (**Fig. S1A**) appears to be simultaneous and proportioned with the  
145 augmentation of specific infectivity (**Fig. 1A**), suggesting that the ability of ZIKV to adapt in  
146 this defined host environment primarily occurred *via* an increased capacity to initiate  
147 infection.

148

149 **Increased specific infectivity of passaged virus temporally associates with the resistance**  
150 **to TLR3-induced antiviral response.**

151 Next, we tested the capacity of these passaged viral populations to propagate when submitted  
152 to the host antiviral response. Huh7.5.1 cells are known to be deficient for TLR3-induced  
153 signaling (28), enabling a specific induction of the antiviral response by complementation *via*  
154 ectopic expression of WT TLR3 (**Fig. S1C**). We showed that the treatment of the WT TLR3  
155 expressing cells by poly(I:C), a mimetic of the intermediate double-stranded RNA produced  
156 during viral replication, leads to a robust ISG up-regulation at mRNA and protein levels,  
157 using ISG15 and MxA as representative ISGs (**Fig. S1D-E**). In contrast, the parental cells  
158 (*i.e.*, without ectopic WT TLR3) did not respond to poly(I:C) (**Fig. S1D-E**). This  
159 demonstrated that WT TLR3 expression renders our cell model responsive to the TLR3  
160 agonist poly(I:C). Specific control of TLR3-induced ISG response was assessed by the

161 absence of ISG up-regulation upon poly(I:C) treatment of cells expressing TLR3 with a  
162 deletion of the Toll/interleukin-1 receptor (TIR) domain of the cytosolic tail ( $\Delta$ TIR-TLR3),  
163 necessary for recruiting the downstream adaptor (*i.e.*, TIR domain-containing adaptor  
164 inducing IFN $\beta$ ; TRIF) (29) (**Fig. S1C-D**).

165 Next using this set up, we showed that poly(I:C)-induced TLR3 signaling greatly decreases  
166 replication of the parental virus, but not of the passaged viral populations *i.e.*, harvested at day  
167 51 (**Fig. 1B**). Especially, the RNA levels measured at 72 hours post-infection were similar in  
168 the TLR3-activated cells *versus* the non-activated cells for the passaged virus (**Fig. 1B**, right  
169 curves). We further determined when, in the course of the experimental evolution, ZIKV  
170 acquired resistance to TLR3-induced antiviral response. We quantified the inhibition of viral  
171 replication by activated-TLR3 signaling for viral populations harvested at different time  
172 points (**Fig. S1F**). In keeping with the results shown in **Fig. 1B**, TLR3-induced antiviral  
173 response inhibited the parental virus replication by up to 90% at 72 hours post-infection. The  
174 resistance to TLR3-mediated inhibition was already observed for the viral populations  
175 harvested at 12 days and at the different MOIs applied (**Fig. S1F**).

176

177 The resistance to TLR3-induced antiviral response can result from a faster onset of infection  
178 by the passaged viral populations. The resulting ongoing replication before the establishment  
179 of a robust antiviral response in host cells would out-compete it. In agreement with this  
180 hypothesis, when using similar MOI - in the absence of TLR3-induced response - the  
181 replication rate of passaged viral populations was significantly faster compared to the parental  
182 virus (**Fig. 1B**, comparing the slope from 24-to-48 hours post-infection). Second, the slopes,  
183 reflecting the speed of viral expansion for the parental virus were similar with *versus* without  
184 antiviral response (**Fig. 1B**, black plain *versus* dotted lines), whereas the passaged viruses  
185 expanded more rapidly in the presence of the antiviral inhibition than in its absence (**Fig. 1B**,

186 blue plain *versus* dotted lines). Similar observations were made for viral populations  
187 harvested at distinct late time points of the experimental evolution, including at days 27, 33  
188 and 36 (**Fig. S1G** and *data not shown*). These observations suggest that the passaged viral  
189 populations might outcompete host antiviral response by an accelerated infection rate.  
190 Altogether, these results demonstrated that the passaged viral populations acquired an  
191 increased capacity for viral spread along with resistance to TLR3-induced antiviral response.

192

### 193 **Increased viral replication depends on the targeted cell type but is independent of the** 194 **ISG response**

195 A faster replication and thus expression of viral proteins compared to host antiviral effectors  
196 can result from more efficient interactions and usages of the host machinery by the passaged  
197 virus, which may be cell-specific. To test these hypotheses, we assessed the infection  
198 efficiency by the passaged virus in different cell environments. First, to assess the infection  
199 speed by the passaged viral population compared to the parental virus, we quantified the size  
200 of infectious foci formed in a limited timeframe, as reflecting the propagation speed *via*  
201 rounds of infection. Foci formed upon infection of Huh7.5.1 cells by the long-term passaged  
202 viral population were significantly larger than those formed by parental virus (**Fig. 1C**, left  
203 panels and **Fig. S2A**, upper panels). This confirmed the increased infection speed of the viral  
204 populations in the cell type used for the experimental evolution. The opposite was observed in  
205 a distinct cell line, *i.e.*, the simian Vero cells (**Fig. 1C and S2A**, left panels). To further  
206 analyze this cell type-specific phenotype, we performed a kinetic analysis of viral replication.  
207 The replication rate of passaged viral populations significantly increased *i.e.*, approx. 10 fold-  
208 increase as compared to parental virus in Huh7.5.1 cells (**Fig. 1D**, upper panel), with similar  
209 ZIKV RNA levels observed early after infection, likely reflecting the viral input. In contrast,  
210 the replication rates of the adapted viral population did not increase compared to the parental



211 virus in Vero cells (**Fig. 1E**, upper panel). The kinetic analysis of the ISG response  
212 (representative MxA and ISG56 mRNAs) demonstrated a difference between the cell types  
213 (**Fig. 1D-E**, lower panels and **Fig S2C-D**). An early ISG response was triggered upon  
214 infection of Huh7.5.1 cells by parental virus, yet only observed with high MOI, and vanished  
215 for the viral populations harvested later in the course of the experimental evolution (**Fig. 1D**  
216 **and S1G-H**). In Vero cells, infection by either viral populations led to similar ISG responses  
217 (**Fig. 1E** and **S2D**). This differential profile of ISG response between the two cell types might  
218 result from the absence in Vero cells of a response to an activating signal contained in the  
219 supernatants harvested at early time-points of the experimental evolution, or alternatively  
220 from a qualitatively and/or quantitatively different cell entry pathway in these cell types.

221 To discriminate these possibilities, we broadened this phenotypic analysis to alternative  
222 human cell types. Similar to Huh7.5.1 cells, the replication rate of adapted viral populations  
223 was significantly increased in HEK-293 cells compared to the parental virus (**Fig. 1F**, upper  
224 panel). Unlike Huh7.5.1 cells, neither parental virus nor adapted viral populations induced an  
225 ISG response in HEK-293 cells (**Fig. 1F** and **S2E**), indicating that higher replication rate of  
226 the adapted viral populations *versus* parental virus can occur independently of an ISG  
227 response. The results also demonstrated that the increased propagation rate of the adapted  
228 viral populations is not restricted to a unique cell type.

229 To further confirm that the increased infection rate by the adapted viral population was  
230 independent from the early ISG response, we compared the viral replication kinetics in both  
231 U6A cells deficient for STAT2 (*i.e.*, an ISG transcription regulator of the signaling pathway  
232 induced by IFN-I and III), and U6A cells complemented for STAT2 expression, referred to as  
233 STAT2-U6A cells (**Fig. 1G**, upper panels). STAT2 expression potentiates the ISG response  
234 upon ZIKV infection with an accelerated response observed at 48 hours post-infection in  
235 STAT2-U6A cells as opposed to the poor response of the corresponding U6A cells (**Fig. 1G**,

236 and **S2F**) and consistently, a decreased viral replication in STAT2-U6A cells compared to the  
237 corresponding U6A cells (**Fig. 1G**, comparing the upper panels). We showed that, in either  
238 the U6A cells or STAT2-U6A cells, the levels of both viral replication and the ISG response  
239 were similar for the adapted *versus* the parental viral populations (**Fig. 1G**). Taken together  
240 our results obtained in cell types failing to respond to ZIKV infection by ISG up-regulation  
241 (*i.e.*, HEK-293) or competent for ISG induction (STAT2-U6A cells) suggested that the  
242 increased infection rate of the adapted viral populations is independent of the extent of ISG  
243 up-regulation.

244 We also tested the rate of viral replication in macrophages differentiated from monocytes  
245 isolated from healthy human blood donors (**Fig. 1H** and **S2B**), representing a cell model  
246 closely related to the cell type targeted *in vivo* by ZIKV (30-33). Interestingly, we observed  
247 that the propagation of the passaged viral populations was significantly abrogated in this  
248 cellular model as compared to the parental virus (**Fig. 1H**). ISG induction was readily  
249 detected in response to the parental virus, but not for the passaged viral population (**Fig. 1H**  
250 **and S2G**).

251 Altogether, these comparative analyses using different cell types suggested that the viral  
252 adaptations lead to higher infection rate independently of the ISG response, thus suggesting  
253 that the ability of passaged viral populations to initiate infection most likely involves viral-  
254 host interactions and entry pathways that depend on the cellular environment.

255

256 **Genetic diversity and evolution of the viral populations determined by deep-sequencing**  
257 **analysis.**

258 To delve into the mechanism underlying the viral adaptation, we analyzed the genomic  
259 diversity of the viral populations harvested in the course of these evolutionary experiments.

260 Conventional sequencing methods provide consensus sequences and cannot detect low

261 frequency variants, which can nevertheless be very important functionally. To bypass this  
262 limitation and generate data of sufficient depth to characterize virus populations, we set up a  
263 kinetic analysis by deep-sequencing the entire genomes of the viral populations sampled at  
264 various time points of the experimental evolution. Our methodology was adapted from the  
265 "CirSeq" method that reduces next-generation sequencing errors (25). The bioinformatic  
266 analyses revealed that CirSeq was successful, with tandem repeat occurrence ranging from  
267 59% to 94% (mean 84%) per read, and repeat sizes ranging from 33 to 97 bases (mean size 50  
268 to 60 bases). The sequences are available in SRA with accession numbers SRX9704326-  
269 SRX9704344; bioproject PRJNA686429. In addition, the coverage quantification revealed  
270 that our methodology using 200-PE runs with HiSeq 2500XL led to a read number/depth as  
271 high as  $2 \times 10^5$  (**Fig. 2A** and **S3A**). Minimal coverage (*i.e.*, read numbers below 1000) was  
272 found at only 55 positions out of all the analyzed libraries and the mean coverage per position  
273 across all analyzed experimental conditions ranged from approx.  $10^4$  to  $10^5$  (**Fig. S3B**),  
274 thus allowing an in-depth analysis of the different viral populations. Moreover, the profiles of  
275 viral genome coverage across all analyzed samples were similar (**Fig. 2A** and **S3A**). These  
276 results thus validated the reproducibility of our experiments and implied that composition  
277 and/or secondary structure of certain viral genome segments had a limited impact on the  
278 sequencing analysis.

279

280 Next, we studied the viral diversity over-time, *i.e.*, mutation frequencies over the course of the  
281 independent runs of experimental evolution (**Fig. 2B-C** and **S3C**). We validated that the  
282 major variant obtained by deep-sequencing of the inoculum used for our experimental  
283 evolutions perfectly matches the clinical isolate (GenBank ID KX197192). To identify  
284 mutations whose frequency significantly varied through time, for each experiment, we  
285 computed position-wise standard deviations of the frequency of the most frequent variant. As

286 shown in **Fig. S4A**, the standard deviations are distributed in two categories: *i/* a high density  
287 of very low frequency variants, likely corresponding to polymorphisms due to the error-prone  
288 feature of the NS5 polymerase and/or generated during library preparation, despite the CirSeq  
289 protocol and *ii/* low density of polymorphisms showing higher standard deviations,  
290 corresponding to mutations that have reached a high frequency during at least one time-point  
291 of one experiment. Further investigation of the variants with standard deviation above a  
292 threshold of 0.1 or 0.02 showed that 4 or 7 variants, respectively, had high standard deviations  
293 in several independent experiments (**Fig. S4B-C**). Focusing on the highest threshold and/or  
294 on substitutions appearing in different independent experiments, 6 variants are spread across  
295 the genome, and reach high frequencies over the course of several experiments (**Fig. 2** and  
296 **S3C**, marked by grey lines, and **S4B**). We provide a representation of variant frequencies at  
297 day 18 that highlights the similarity of the frequency profiles between independent  
298 experiments (**Fig. 2C**).

299

### 300 **Identification of candidate adaptive mutations in ZIKV E and NS4B proteins.**

301 We further analyzed the mutations that passed the standard deviation thresholds, considering  
302 them as candidate adaptive mutations (**Fig. 2D-F** and **S4B-C**). Among the 4 variants that  
303 passed the 0.1 threshold, 3 positions do so in a number ( $n$ ) = 3 of experiments (*i.e.*, 1786,  
304 2341, 7173); 1 additional position does so in  $n$  = 2 (*i.e.*, 2194) (**Fig. 2D-E**). Additional  
305 positions are found when the threshold is set to 0.02 for  $n$  = 3 (*i.e.*, 5663, 10007) (**Fig. 2F**).  
306 Among these variants, some are synonymous mutations within the coding part of the ZIKV  
307 polyprotein, and others appear in a limited number of samples and/or are not concomitant to  
308 the phenotypic adaptation (*i.e.*, position 2194, **Fig. 2E**). The non-synonymous C1786T  
309 mutation, leading to the reversion at position 270 of E envelope protein from V to A and

310 present in the clinical isolate (ZIKV PE243, KX197192) (34), had a high frequency at the  
311 beginning of the experiments, likely resulting from the initial viral amplification in Vero cells.

312

313 The frequency of the C2341T mutation increased from days 6-to-12 (**Fig. 2D**), thus preceding  
314 both the augmented specific infectivity and the acquisition of resistance to TLR3-induced  
315 antiviral response and (**Fig. 1A and S1A-B**). This corresponds to a mutation of amino acid S-  
316 to-L, at position 455 of the E envelope protein. Likewise, the frequency of T7173C was  
317 observed as early as day 9 in some experiments and becomes the majority variant by day 18-  
318 to-24 in the independent experiments (**Fig. 2D**). This corresponds to a Y-to-H mutation at  
319 position 87 in the NS4B protein. These mutations were observed in viral populations  
320 harvested from all the independent experiments (**Fig. 2D**). Together, the bioinformatic  
321 analyses of the viral genomes at different time points during experimental evolution  
322 underscored the repeated increases in frequency of point mutations in E and NS4B proteins,  
323 temporally correlating the phenotype of viral adaptation defined in the course of the  
324 independent runs of experimental evolution.

325

326 **The S455L mutation in the E viral protein recapitulates both the increased specific**  
327 **infectivity and the resistance to TLR3 antiviral response.**

328 To functionally validate the candidate adaptive mutations, the S455L mutation in the E  
329 envelope protein and the Y87H mutation in NS4B were introduced alone or combined in a  
330 corresponding recombinant ZIKV. First, we generated a ZIKV molecular clone (referred to as  
331 ‘ref no mut’) corresponding to the clinical isolate used for experimental evolution by  
332 introducing R99G and Y122H mutations in NS1 in the previously reported molecular clone  
333 BeH819015 (35). Of note, we showed the absence of significant impact of these NS1  
334 mutations on viral spread and specific infectivity (**Fig. S5A-C**).

335

336 The efficiency of transfection of the different mutants was comparable to that of the  
337 reference, as determined by ZIKV intracellular levels at 6 hours post-transfection (**Fig. S5G**).

338 While the Y87H mutation in NS4B showed no significant difference as compared to the  
339 reference (ref no mut), the S455L mutation in the E protein significantly increased the rate of  
340 viral replication when present alone or in combination with Y87H in NS4B (**Fig. 3A**). The  
341 S455L mutation in E also recapitulated the enhanced specific infectivity observed for viral  
342 populations evolved in the course of the evolution experiments (compare **Fig. 3B** to **1A**).

343

344 We further showed that the size of infectious foci formed in a limited timeframe (*i.e.*,  
345 reflecting the speed of viral propagation *via* new rounds of infection, as in **Fig. 1C**)  
346 significantly increased upon infection with the E S455L mutant as compared to the reference  
347 in Huh7.5.1 cells (**Fig. 3C** and **S5H**, left panels). In contrast, the size of infectious foci  
348 formed upon infection by E S455L mutant was reduced as compared to the reference in Vero  
349 cells (**Fig. 3C** and **S5H**, right panels). This is consistent with the observations for the viral  
350 populations adapted in the course of experimental evolution (**Fig. 1C**). We demonstrated that,  
351 similar to the adapted viral populations obtained in the experimental evolutions, the E S455L  
352 mutant resists inhibition by TLR3-induced antiviral response (**Fig. 3D**, right curves), as  
353 opposed to the reference molecular clone (**Fig. 3D**, left curves). Altogether, our results  
354 demonstrated that the S455L point mutation located in proximity to the trans-membrane  
355 domain of ZIKV E protein and interacting with membrane lipid and/or with the viral protein  
356 M (**Fig. S7**) recapitulates the phenotype observed with the adapted viral population.

357

358 Given that the E S455L mutation causes improved viral replication both in the presence and  
359 absence of TLR3-induced signaling, we asked whether an accelerated onset of replication

360 could provide a unifying mechanism. To this end, we modeled this mechanism  
361 mathematically and compared the model results with our experimental data. The model (**Fig.**  
362 **4A**) describes the infection of susceptible cells, which, after a time delay, enter a phase of  
363 productive replication. Produced infectious virions can then infect other susceptible cells.  
364 Individual cells in this multiscale model will have their own time course of ZIKV replication,  
365 depending on the time of infection (**Appendix 1, mathematical model**). We determined the  
366 kinetic parameters of the model (including infection rate, delay to productive replication,  
367 replication rate, virion production rate and infection-induced cell death rate) by fitting the  
368 model to two sets of experimental data (**Fig. 3 and S1G**). The effects of both evolution and  
369 introduction of the E S455L point mutation were modeled by allowing the delay to productive  
370 replication to be different from parental and reference strains, respectively, keeping all other  
371 parameters identical. The model captured the data (**Fig. 4B-C**) with a well-constrained set of  
372 parameter values (**Fig. S6**). The delay to productive replication was shortened from around 8  
373 hours for the (parental or reference) controls to 6 hours or less for the adapted or mutated  
374 strains (**Fig. 4D**). Our model thus suggests that the E S455L mutation allows a reduced time-  
375 lag between infection and viral replication, which suffices to cause increased virus spread,  
376 and probably the associated resistance to the TLR3-induced antiviral response.

377

## 378 **Discussion**

379

380 Experimental evolution in a stable and controlled cell environment uncovered ZIKV  
381 adaptations leading to the avoidance of induced host antiviral response *via* an increased  
382 specific infectivity. Bioinformatic analysis of the viral evolution pinpointed candidate viral  
383 determinants, whose frequencies increased concomitantly with the acquisition of the adapted  
384 phenotype. We further showed that viral adaptation augmented infection independently of the

385 ISG response and in specific cellular environments, thus suggesting a modulation of the host-  
386 virus interaction involved at the early step of ZIKV infection. Consistently, we uncovered a  
387 key determinant in the envelope (E) protein that both augments the probability for one  
388 physical virus to initiate infection in certain cell environments and allows resistance to the  
389 TLR3-induced antiviral response.

390

### 391 **Proposed mechanism for the resistance to antiviral response**

392 Since the acquisition of both increased specific infectivity and resistance to TLR3-induced  
393 antiviral response were temporally associated during the experimental evolution, and knowing  
394 that the E S455L point mutation reproduces both phenotypes, we propose that the two  
395 phenotypes are causally linked. Like other flaviviruses, ZIKV has evolved inhibitory  
396 mechanisms against antiviral responses, including blockage of the response to type I and III  
397 IFNs by NS5-mediated degradation of STAT2 (1-4). Our results suggest that viral adaptation  
398 occurs *via* a reduction of the time delay prior to the onset of productive infection rather than  
399 by directly modulating virus-mediated inhibition of the host antiviral detection. First, we  
400 showed that improved viral replication of the adapted populations was independent of the  
401 amplitude of the ISG response, as demonstrated using HEK-293 where the ISG up-regulation  
402 is absent. Second, the comparison of the U6A-STAT2 cells *versus* the corresponding U6A  
403 cells (*i.e.*, STAT2 deficient) indicated that the adapted viral populations did not differentially  
404 inhibit ISG responses induced by Jak/STAT signaling compared to the parental virus. Third,  
405 the kinetic analysis demonstrated that the adapted viral populations showed enhanced  
406 resistance to TLR3-mediated inhibition at later time-points post-infection, and with higher  
407 viral input. Fourth, our mathematical model of ZIKV infection and replication showed that a  
408 reduced time-lag prior to the establishment of productive infection suffice to cause increased  
409 virus spread, and hence the associated resistance to the antiviral response. In accordance with



410 the model, we demonstrated an increased specific infectivity of the adapted viral populations  
411 and E S455L mutated recombinant virus, suggesting adaptation of host-ZIKV interaction at  
412 the early step of infection.

413 As this viral adaptation is cell type-restricted, the adapted viral populations likely become  
414 fitter by interacting with host factors preferentially present or conversely at a limiting level in  
415 certain cell types at early stages of infection (*e.g.*, some characteristic of the entry pathway  
416 including endosome acidification and/or AXL receptor) (36-38). Overall our results indicated  
417 that the observed viral adaptation most likely results from an improved ability to rapidly and  
418 efficiently establish viral replication. Hence a faster accumulation of viral products in newly  
419 infected cells can overwhelm and/or bypass the host antiviral factors.

420

421 **Identification of a key determinant in ZIKV E responsible for increased specific**  
422 **infectivity.**

423 The bioinformatic analysis identified the mutations S455L in E and Y87H in NS4B as  
424 reproducibly associated to the adapted phenotype. The high mutation rate of ZIKV allowed  
425 the same mutation to appear in several replicates; then, the strong fitness benefits this  
426 mutation provided in the cell environment allowed it to rise in frequency through selection.  
427 The functional analysis by insertion of the candidate mutations in a ZIKV molecular clone  
428 demonstrated that the S455L mutation in E is a pivotal viral determinant controlling both  
429 improved viral spread and resistance to TLR3-induced antiviral signaling, probably through  
430 accelerated replication onset according to our mathematical model.

431

432 The cellular study model has a reduced complexity compared to whole organisms (*e.g.*,  
433 unique cell type, restricted diversity of antiviral sensing and absence of adaptive response and  
434 physico-chemical constraints such as blood flow). This enabled the discovery of viral

435 adaptation improving fitness in a stable and well-defined cell environment without trade-offs  
436 caused by alternative virus/host interactions (39, 40). At the organism scale, interferences  
437 between several selective pressures could impede the acquisition of some optimized  
438 interaction(s). This may explain why the adaptive mutation at position 455 of the E envelope  
439 protein is found in a very limited number of isolates in the ZIKV database of sequences  
440 isolated from patients (*i.e.*, only in 2 out of 519 ZIKV full genome sequences issued from  
441 patients; NCBI Virus Variation Resource on December 21 2020) and is not maintained in a  
442 mutational scanning using a different cell type and strain (41). Alternatively, adaptive  
443 mutations may enable the virus to infect different cell types with differential efficiency. In  
444 this scenario, the most frequent ZIKV variants would be well adapted to infect the major  
445 target cell types, while low-frequency variants would be better at infecting specific cell types.  
446 In accordance with this, comparison between various cell types showed that the adapted  
447 phenotype is cell type-restricted, indicating that the targeted host factor is differentially  
448 involved in viral replication depending on the cell type. This also suggests cell type-specific  
449 trade-offs for the virus: adaptation to a particular cell environment limits infectivity in other  
450 cellular environments.

451

452 The position 455 is located at the C-terminus of the stem region, next to the transmembrane  
453 domain of the E protein (42-44). In the structure of E (5ire.pdb reference) (44), the position  
454 455 is located near the membrane surface, in an environment of nearly exclusively polar and  
455 hydrophobic residues (**Fig. S7**). Its side chain hydroxyl does not show interactions with the  
456 transmembrane helix of the M protein facing it, but is likely involved in lipid headgroup  
457 interactions. A mutation from polar to hydrophobic in this region thus has the potential to  
458 change the membrane anchorage and insertion of the protein. The *in silico* estimation of the  
459 structural changes induced by the S455L mutation suggested that this adaptive mutation

460 might enhance the stability of the E protein *via* its interaction with apposed segments in M or,  
461 more likely, with specific membrane lipids (**Fig. S7**). Consistent with the known regulatory  
462 function of this segment in flaviviruses (42-47), we propose that the E S455L mutation  
463 modulates the membrane fusion process and/or E protein membrane incorporation. Thus,  
464 albeit future analysis is required to test this hypothesis, the structural property of the E S455L  
465 mutation is in agreement with the demonstration of an ability to better initiate *de novo*  
466 infection (*i.e.*, increased specific infectivity) of the E adaptive mutant. Therefore, we propose  
467 a working model of viral adaptation *via* an optimized interaction with the host machinery  
468 involved at an early stage of infection, via E membrane interactions, and likely by modulating  
469 its function in membrane fusion. In turn, higher infectivity would result in the accelerated  
470 accumulation of viral products and/or altered entry pathway that overcome or bypass host  
471 antiviral responses.

472 In conclusion, we established a framework to study viral adaptation in a stable and controlled  
473 cellular environment leading to outcomes (*i.e.*, mutation and phenotype) reproducibly  
474 observed in independent runs of experimental evolution. The novel methods of deep  
475 sequencing and bioinformatics set up here allowed the identification of mutations at low  
476 frequency arising across the entire viral genome, as expected for RNA viruses with a high  
477 error rate during replication. The profiles of frequency increase of the variants suggested that  
478 they were *bona fide* variants, not experimental artifacts of our sequencing protocol. Focusing  
479 on the mutations that reached high frequency and whose increased frequency is temporally  
480 associated to the adapted phenotype, we functionally validated one of them by recapitulating  
481 the observed phenotypes, thus showing the power of our approach combining viral evolution,  
482 mathematic modeling and functional assays. Looking forward, our approach can serve as a  
483 framework to study viral interactions with host restriction mechanisms and uncanonical cell  
484 entry pathways as well as antiviral strategies.

485 **Material and Methods**

486

487 **Biological materials**

488 Huh7.5.1 cells, Vero E6 cells, U6A cells expressing or not human STAT2 (reciprocally  
489 kindly provided by Dr F.V. Chisari, Scripps Research Institute; Dr M Bouloy, Institut Pasteur;  
490 Dr M. Koester, Helmholtz-Zentrum für Infektionsforschung) and HEK-293 cells (ATCC  
491 CRL-1573) were cultured as previously described (48, 49). Monocytes were isolated from  
492 blood from healthy adult human volunteers, obtained according to procedures approved by  
493 the ‘Etablissement Français du sang’ (EFS) Committee. Monocytes were positively selected  
494 using anti-CD14 microbeads (MACS Miltenyi Biotec) from PBMCs isolated using Ficoll-  
495 Hypaque density centrifugation. The details of the reagent, culture, infections, analysis of  
496 viral replication and spread along with the statistical analysis of viral parameters are described  
497 in SI Materials and Methods. To get a controlled set up for the evolutionary experiment and in  
498 line with our strategy to work in a cell environment non-responsive to viral products, we used  
499 Huh7.5.1. In addition, to enable the subsequent study of the influence of activated antiviral  
500 response on the evolved ZIKV populations (*i.e.*, TLR3-induced signaling by poly(I:C)  
501 treatment), we transduced Huh7.5.1 cells with a WT TLR and as reference control: a mutant  
502 TLR3 invalidated for signaling via a deletion of the Toll/interleukin-1 receptor (TIR) domain  
503 of the cytosolic tail ( $\Delta$ TIR-TLR3) (28, 29). The retroviral-based vectors expressing WT TLR3  
504 and  $\Delta$ TIR-TLR3 were produced in HEK-293T cells and used to transduce Huh7.5.1 cells, as  
505 we previously described (50).

506

507 **Serial passaging of viral populations, deep sequencing and bioinformatic analysis for the**  
508 **selection of variants.**

509

510 A clinical isolate of ZIKV from Brazil collected from a patient during the epidemics  
511 (PE243\_KX197192) was amplified using Vero E6 cells (34). The serial passaging of viral  
512 populations was performed by inoculation of Huh7.5.1 cells expressing  $\Delta$ TIR TLR3 as  
513 detailed in SI Materials and Methods. At the indicated time, supernatants were harvested from  
514 the infected cells, and multiplexed Illumina libraries for deep sequencing generated from  
515 extracted RNA via tandem repeats of the fragment to reduce the error rate of next-generation  
516 sequencing (25) were sequenced using HiSeq 2500XL (Illumina), using a 200-PE run at the  
517 EMBL Genecore Facility (Heidelberg, Germany).

518 Reads were quality-checked and trimmed of sequencing adapters and then mapped using  
519 PEAR (51) and in-house software (<https://github.com/Kobert/viroMapper>) as detailed in SI  
520 Materials and Method. To detect variants of interest, for each site and in each experiment, we  
521 computed the standard deviation of the frequency of the major variant, as represented in **Fig.**  
522 **S4A**. A Jupyter notebook reproducing these analyses will be made available upon publication.

523

#### 524 **Introduction of selected mutation and analysis of adapted mutants in the ZIKV** 525 **infectious clone.**

526 Mutations were introduced in the genomic length ZIKV infectious clone cDNA, pCCI-SP6-  
527 ZIKV BeH819015 plasmid (35). For adequate comparison with clinical isolate PE243 (34),  
528 the R99G and Y122H mutations in NS1 were introduced in pCCI-SP6-ZIKV BeH819015  
529 plasmid. The introduction of the mutants, the preparation of *in vitro* RNA transcripts and  
530 analysis of viral replication are described in SI Materials and Method.

531

#### 532 **Acknowledgements**

533 We thank P. Despres (PIMIT, Université de La Réunion-INSERM France) for the anti-E 4G2  
534 antibody; F.V. Chisari (Scripps Research Institute, La Jolla, CA) for Huh-7.5.1 cells; Dr M

535 Bouloy (Institut Pasteur, Paris, France) for Vero E6 cells and by Dr M. Köster (Helmholtz-  
536 Zentrum für Infektionsforschung) for U6A cells. We are grateful to Y. Jaillais for critical  
537 reading of the manuscript. We acknowledge the contribution of SFR Biosciences  
538 (UMS3444/CNRS, US8/Inserm, ENS de Lyon, UCBL) facilities. This work was supported by  
539 grants from the “Agence Nationale pour la Recherche” (ANR-JCJC-EXAMIN), the “Agence  
540 Nationale pour la Recherche contre le SIDA et les Hépatites Virales” (ANRS-AO 2017-01),  
541 the European Union's Horizon 2020 Research and innovation program under  
542 “ZIKALLIANCE” (Grant Agreement no. 734548) to MD. The grants from “Fondation pour  
543 la recherche médicale” (contract Bioinformatic analysis for research in biology,  
544 DBI20141231313 and from the “Agence Nationale pour la Recherche” LabEx Ecofect (Grant  
545 ANR-11-LABX-0048) to MD, BB and AB. AK is supported by the UK Medical Research  
546 Council (MC\_UU\_12014/8, MR/N017552/1).

547 **References**

- 548 1. M. G. Zimmerman *et al.*, STAT5: a Target of Antagonism by Neurotropic  
549 Flaviviruses. *Journal of virology* **93** (2019).
- 550 2. T. M. Serman, M. U. Gack, Evasion of Innate and Intrinsic Antiviral Pathways by the  
551 Zika Virus. *Viruses* **11** (2019).
- 552 3. W. Riedl *et al.*, Zika Virus NS3 Mimics a Cellular 14-3-3-Binding Motif to  
553 Antagonize RIG-I- and MDA5-Mediated Innate Immunity. *Cell host & microbe* **26**,  
554 493-503 e496 (2019).
- 555 4. B. Wang *et al.*, Structural basis for STAT2 suppression by flavivirus NS5. *Nat Struct*  
556 *Mol Biol* **27**, 875-885 (2020).
- 557 5. P. Brasil *et al.*, Zika Virus Outbreak in Rio de Janeiro, Brazil: Clinical  
558 Characterization, Epidemiological and Virological Aspects. *PLoS Negl Trop Dis* **10**,  
559 e0004636 (2016).
- 560 6. V. M. Cao-Lormeau *et al.*, Guillain-Barre Syndrome outbreak associated with Zika  
561 virus infection in French Polynesia: a case-control study. *Lancet* S0140-  
562 6736(16)00562-6 [pii]  
563 10.1016/S0140-6736(16)00562-6 (2016).
- 564 7. W. K. de Oliveira *et al.*, Infection-related microcephaly after the 2015 and 2016 Zika  
565 virus outbreaks in Brazil: a surveillance-based analysis. *Lancet* **390**, 861-870 (2017).
- 566 8. D. F. Robbiani *et al.*, Risk of Zika microcephaly correlates with features of maternal  
567 antibodies. *The Journal of experimental medicine* jem.20191061 [pii]  
568 10.1084/jem.20191061 (2019).
- 569 9. F. R. Cugola *et al.*, The Brazilian Zika virus strain causes birth defects in experimental  
570 models. *Nature* **534**, 267-271 (2016).
- 571 10. L. J. Yockey *et al.*, Type I interferons instigate fetal demise after Zika virus infection.  
572 *Sci Immunol* **3** (2018).
- 573 11. C. Li *et al.*, Zika Virus Disrupts Neural Progenitor Development and Leads to  
574 Microcephaly in Mice. *Cell Stem Cell* S1934-5909(16)30084-4 [pii]  
575 10.1016/j.stem.2016.04.017 (2016).
- 576 12. E. A. Caine *et al.*, Interferon lambda protects the female reproductive tract against  
577 Zika virus infection. *Nat Commun* **10**, 280 (2019).
- 578 13. B. W. Jagger *et al.*, Gestational Stage and IFN-lambda Signaling Regulate ZIKV  
579 Infection In Utero. *Cell host & microbe* **22**, 366-376 e363 (2017).
- 580 14. J. J. Miner *et al.*, Zika Virus Infection during Pregnancy in Mice Causes Placental  
581 Damage and Fetal Demise. *Cell* **165**, 1081-1091 (2016).
- 582 15. J. Dang *et al.*, Zika Virus Depletes Neural Progenitors in Human Cerebral Organoids  
583 through Activation of the Innate Immune Receptor TLR3. *Cell Stem Cell* S1934-  
584 5909(16)30057-1 [pii]  
585 10.1016/j.stem.2016.04.014 (2016).
- 586 16. R. Hamel *et al.*, Biology of Zika Virus Infection in Human Skin Cells. *Journal of*  
587 *virology* **89**, 8880-8896 (2015).
- 588 17. M. Bollati *et al.*, Structure and functionality in flavivirus NS-proteins: perspectives for  
589 drug design. *Antiviral Res* **87**, 125-148 (2010).
- 590 18. L. A. Moser *et al.*, Growth and adaptation of Zika virus in mammalian and mosquito  
591 cells. *PLoS Negl Trop Dis* **12**, e0006880 (2018).
- 592 19. L. Barzon *et al.*, Virus and Antibody Dynamics in Travelers With Acute Zika Virus  
593 Infection. *Clin Infect Dis* **66**, 1173-1180 (2018).



- 594 20. M. Stone *et al.*, Zika virus RNA and IgM persistence in blood compartments and body  
595 fluids: a prospective observational study. *Lancet Infect Dis* S1473-3099(19)30708-X  
596 [pii]  
597 10.1016/S1473-3099(19)30708-X (2020).
- 598 21. A. Sanchez-Montalva, F. Salvador, I. Molina, Persistence of Zika Virus in Body  
599 Fluids - Final Report. *N Engl J Med* **380**, 198 (2019).
- 600 22. G. Paz-Bailey, E. S. Rosenberg, T. M. Sharp, Persistence of Zika Virus in Body Fluids  
601 - Final Report. *N Engl J Med* **380**, 198-199 (2019).
- 602 23. J. J. Hoarau *et al.*, Persistent chronic inflammation and infection by Chikungunya  
603 arthritogenic alphavirus in spite of a robust host immune response. *J Immunol* **184**,  
604 5914-5927 (2010).
- 605 24. S. Ozden *et al.*, Human muscle satellite cells as targets of Chikungunya virus  
606 infection. *PLoS ONE* **2**, e527 (2007).
- 607 25. A. Acevedo, L. Brodsky, R. Andino, Mutational and fitness landscapes of an RNA  
608 virus revealed through population sequencing. *Nature* **505**, 686-690 (2014).
- 609 26. J. F. Gout *et al.*, The landscape of transcription errors in eukaryotic cells. *Sci Adv* **3**,  
610 e1701484 (2017).
- 611 27. R. Sumpter *et al.*, Regulating intracellular antiviral defense and permissiveness to  
612 hepatitis C virus RNA replication through a cellular RNA helicase, RIG-I. *Journal of*  
613 *virology* **79**, 2689-2699 (2005).
- 614 28. N. Wang *et al.*, Toll-like receptor 3 mediates establishment of an antiviral state against  
615 hepatitis C virus in hepatoma cells. *Journal of virology* **83**, 9824-9834 (2009).
- 616 29. L. Alexopoulou, A. C. Holt, R. Medzhitov, R. A. Flavell (2001) Recognition of  
617 double-stranded RNA and activation of NF-kappaB by Toll-like receptor 3. in *Nature*,  
618 pp 732-738.
- 619 30. A. F. Carlin *et al.*, Deconvolution of pro- and antiviral genomic responses in Zika  
620 virus-infected and bystander macrophages. *Proceedings of the National Academy of*  
621 *Sciences of the United States of America* **115**, E9172-E9181 (2018).
- 622 31. K. A. Jurado *et al.*, Zika virus productively infects primary human placenta-specific  
623 macrophages. *JCI Insight* **1** (2016).
- 624 32. J. Lang *et al.*, An hPSC-Derived Tissue-Resident Macrophage Model Reveals  
625 Differential Responses of Macrophages to ZIKV and DENV Infection. *Stem Cell*  
626 *Reports* **11**, 348-362 (2018).
- 627 33. K. M. Quicke *et al.*, Zika Virus Infects Human Placental Macrophages. *Cell host &*  
628 *microbe* **20**, 83-90 (2016).
- 629 34. C. L. Donald *et al.*, Full Genome Sequence and sfRNA Interferon Antagonist Activity  
630 of Zika Virus from Recife, Brazil. *PLoS Negl Trop Dis* **10**, e0005048 (2016).
- 631 35. M. Mutso *et al.*, Reverse genetic system, genetically stable reporter viruses and  
632 packaged subgenomic replicon based on a Brazilian Zika virus isolate. *The Journal of*  
633 *general virology* **98**, 2712-2724 (2017).
- 634 36. J. Chen *et al.*, AXL promotes Zika virus infection in astrocytes by antagonizing type I  
635 interferon signalling. *Nat Microbiol* **3**, 302-309 (2018).
- 636 37. E. G. Acosta, V. Castilla, E. B. Damonte, Alternative infectious entry pathways for  
637 dengue virus serotypes into mammalian cells. *Cell Microbiol* **11**, 1533-1549 (2009).
- 638 38. M. F. Wells *et al.*, Genetic Ablation of AXL Does Not Protect Human Neural  
639 Progenitor Cells and Cerebral Organoids from Zika Virus Infection. *Cell Stem Cell* **19**,  
640 703-708 (2016).
- 641 39. Y. Arai *et al.*, Novel Polymerase Gene Mutations for Human Adaptation in Clinical  
642 Isolates of Avian H5N1 Influenza Viruses. *PLoS Pathog* **12**, e1005583 (2016).



- 643 40. B. S. Chambers, Y. Li, R. L. Hodinka, S. E. Hensley, Recent H3N2 influenza virus  
644 clinical isolates rapidly acquire hemagglutinin or neuraminidase mutations when  
645 propagated for antigenic analyses. *Journal of virology* **88**, 10986-10989 (2014).
- 646 41. M. Sourisseau *et al.*, Deep Mutational Scanning Comprehensively Maps How Zika  
647 Envelope Protein Mutations Affect Viral Growth and Antibody Escape. *Journal of*  
648 *virology* **93** (2019).
- 649 42. V. A. Kostyuchenko *et al.*, Structure of the thermally stable Zika virus. *Nature* **533**,  
650 425-428 (2016).
- 651 43. V. M. Prasad *et al.*, Structure of the immature Zika virus at 9 Å resolution. *Nat Struct*  
652 *Mol Biol* **24**, 184-186 (2017).
- 653 44. D. Sirohi *et al.*, The 3.8 Å resolution cryo-EM structure of Zika virus. *Science (New*  
654 *York, N.Y)* **352**, 467-470 (2016).
- 655 45. D. E. Klein, J. L. Choi, S. C. Harrison, Structure of a dengue virus envelope protein  
656 late-stage fusion intermediate. *Journal of virology* **87**, 2287-2293 (2013).
- 657 46. X. Zhang *et al.*, Cryo-EM structure of the mature dengue virus at 3.5-Å resolution.  
658 *Nat Struct Mol Biol* **20**, 105-110 (2013).
- 659 47. K. Stiasny, S. Kiermayr, A. Bernhart, F. X. Heinz, The membrane-proximal "stem"  
660 region increases the stability of the flavivirus E protein postfusion trimer and  
661 modulates its structure. *Journal of virology* **87**, 9933-9938 (2013).
- 662 48. E. Decembre *et al.*, Sensing of immature particles produced by dengue virus infected  
663 cells induces an antiviral response by plasmacytoid dendritic cells. *PLoS Pathog* **10**,  
664 e1004434 (2014).
- 665 49. T. Frahm, H. Hauser, M. Koster, IFN- $\gamma$ -mediated signaling is regulated by  
666 modulation of STAT2 nuclear export. *Journal of cell science* **119**, 1092-1104 (2006).
- 667 50. M. Dreux *et al.*, Short-range exosomal transfer of viral RNA from infected cells to  
668 plasmacytoid dendritic cells triggers innate immunity. *Cell host & microbe* **12**, 558-  
669 570 (2012).
- 670 51. J. Zhang, K. Kobert, T. Flouri, A. Stamatakis, PEAR: a fast and accurate Illumina  
671 Paired-End reAd mergeR. *Bioinformatics* **30**, 614-620 (2014).
- 672



**Figure 1. Increased specific infectivity and resistance to TLR3-mediated inhibition of serially passaged viral populations.** **A.** As shown on the schematic representation of the experimental procedure for the serially passaging of ZIKV viral populations: every 3 days, viral supernatants were harvested, infectivity levels determined and, accordingly, used to infect naïve cells. Quantification of the specific infectivity (*i.e.*, defined as the probability for one physical virion to initiate infection) of the viral populations harvested over serially passaging in the course of 3 independent run of experimental evolution (referred to as #1, #2, #3 and stop at days 54, 21 and 18 respectively). Results are expressed as the ratio of the extracellular infectivity levels relative to extracellular ZIKV RNA levels and relative to day 3 for each independent passaging in control cells set to 1; 2-to-3 independent determination by RT-qPCR and infectious titrations for each evolution experiment; mean  $\pm$  SD. **B.** Quantification of the intracellular ZIKV genome levels in kinetic analysis of serially passaged viral populations (*i.e.*, day 51 of the viral passaging) *versus* parental virus assessed in activated-TLR3 cells (dotted lines) as compared to control cells (solid lines) ; at the indicated times post-infection at MOI 0.05; 4 independent experiments; mean  $\pm$  SD. The statistical comparison of intracellular ZIKV GE levels for the same viral population at the same time point post-infection between the target cells (*i.e.*, activated-TLR3 cells and control cells) is indicated in the table at the top of the graphs with indicated p-values and NS;  $p > 0.05$ . The intracellular ZIKV GE levels at a same time post-infection between parental and passaged virus determined as significantly different ( $p < 0.05$ ) are indicated by brackets: dotted lines for the comparison of levels in activated-TLR3 cells and solid lines for the comparison of levels in control cells. **C.** Violin plot representation of the focus size at 48 hours post-infection by parental virus versus serially passaged virus (*i.e.*, day 51 of the viral passaging) in Huh7.5.1 cells and Vero cells. The size index for each infectious focus is displayed by an individual dot; 5 independent measurements; statistical analysis as indicated by p-values. **D-H.** Kinetic quantification post-infection by parental versus serially passaged viral population (*i.e.*, day 51 of the viral passaging) in Huh7.5.1 (**D**), Vero cells (**E**), HEK-293 cells (**F**), U6A cells and STAT2 expressing U6A cells (**G**) and macrophages derived from monocytes (**H**). Results present the levels of intracellular ZIKV GE (upper panels) and MxA (lower panels) mRNA levels relative to the levels in non-infected cells, at the indicated time post-infection at MOI 0.1; 3-to-7 independent experiments; mean  $\pm$  SD. The p-values of the statistical analysis of the kinetics performed using mixed linear model are indicated on the right side of the graphs, p-value are for the comparison of passaged viral population versus parental virus, and NS;  $p > 0.05$ .

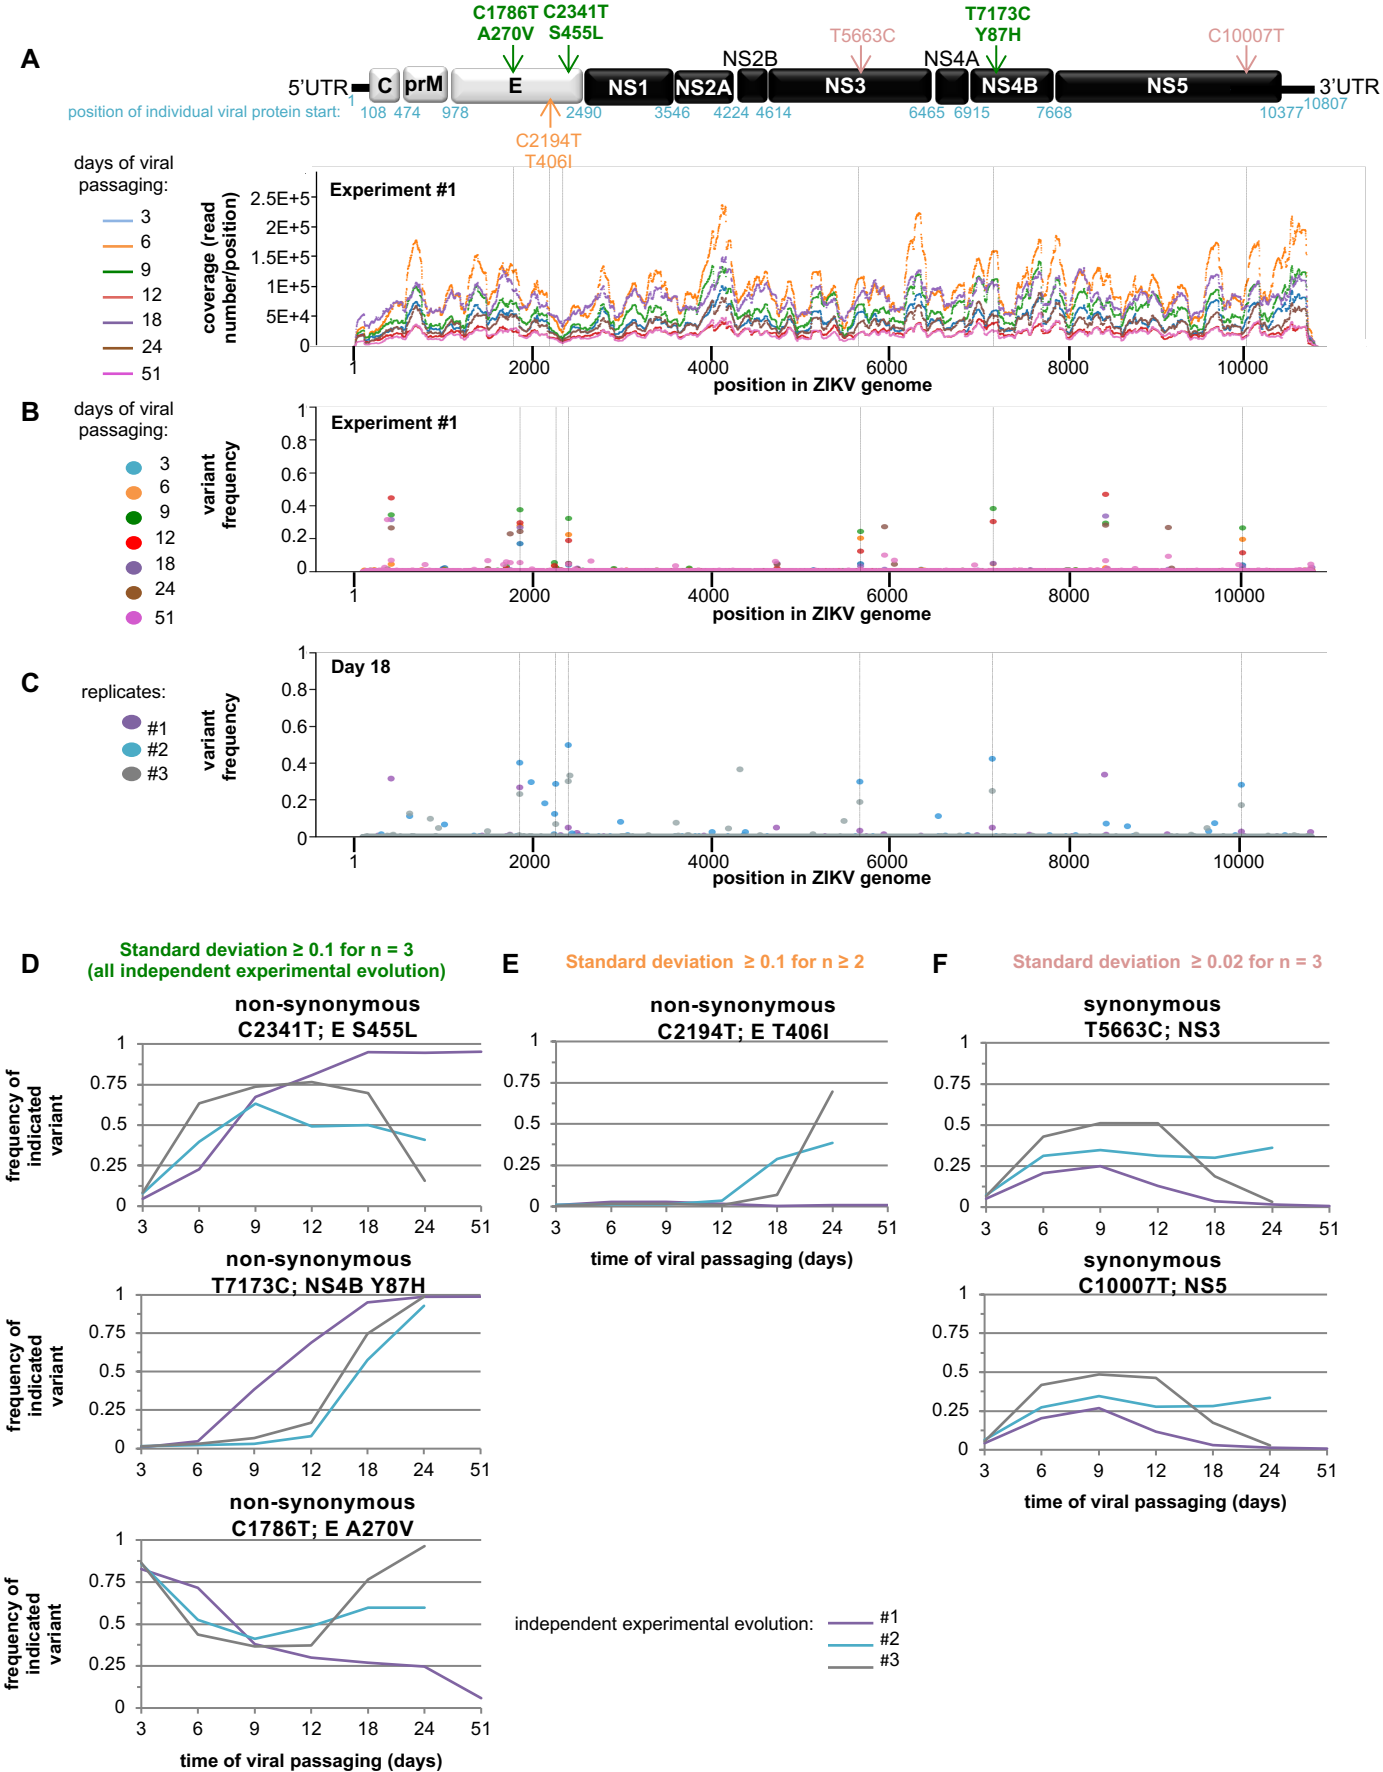

Figure 2

**Figure 2. Bioinformatic analysis of the genetic evolution of viral populations obtained by next-generation sequencing.** **A.** Coverage of the next-generation sequencing analysis along the ZIKV genome sequence of viral populations harvested at the indicated time points of the serial passaging of one representative independent run of evolution experiment. Results are expressed as number of reads per position; schematic representation of ZIKV genome at the top. **B-C.** Time-course quantification of the frequency of the second most frequent variants at each position along ZIKV genome in the viral populations harvested in one representative independent run of evolution experiment (**B**) and in the viral populations harvested at day 18 in 3 independent runs of evolution experiments (**C**). Dotted lines indicate the positions in the viral genome with high standard deviations in several runs of experimental evolution, as defined in **Fig S4**. **C. D-F.** Time-course quantification of the frequency of variants determined by next-generation sequencing. The variants were selected when the standard deviations of their frequencies were:  $\geq 0.1$  for all the 3 independent runs of experimental evolution ( $n = 3$ ;  $n$  referred to one replicate of one condition at given time of harvest) (**D**);  $\geq 0.1$  for a minimum of 2 samples (**E**), and  $\geq 0.02$  for a minimum of 3 samples (**F**), with thresholds defined according to the density of variants relative to their frequency for the pool of all analyzed samples, as presented in Fig S4. The variants are indicated as nucleotide position (*e.g.*, C2340T), the corresponding viral protein (*e.g.*, E) and amino acid change for non-synonymous mutations (*e.g.*, S455L); as also shown on the schematic representation of ZIKV genome organization (**A**).

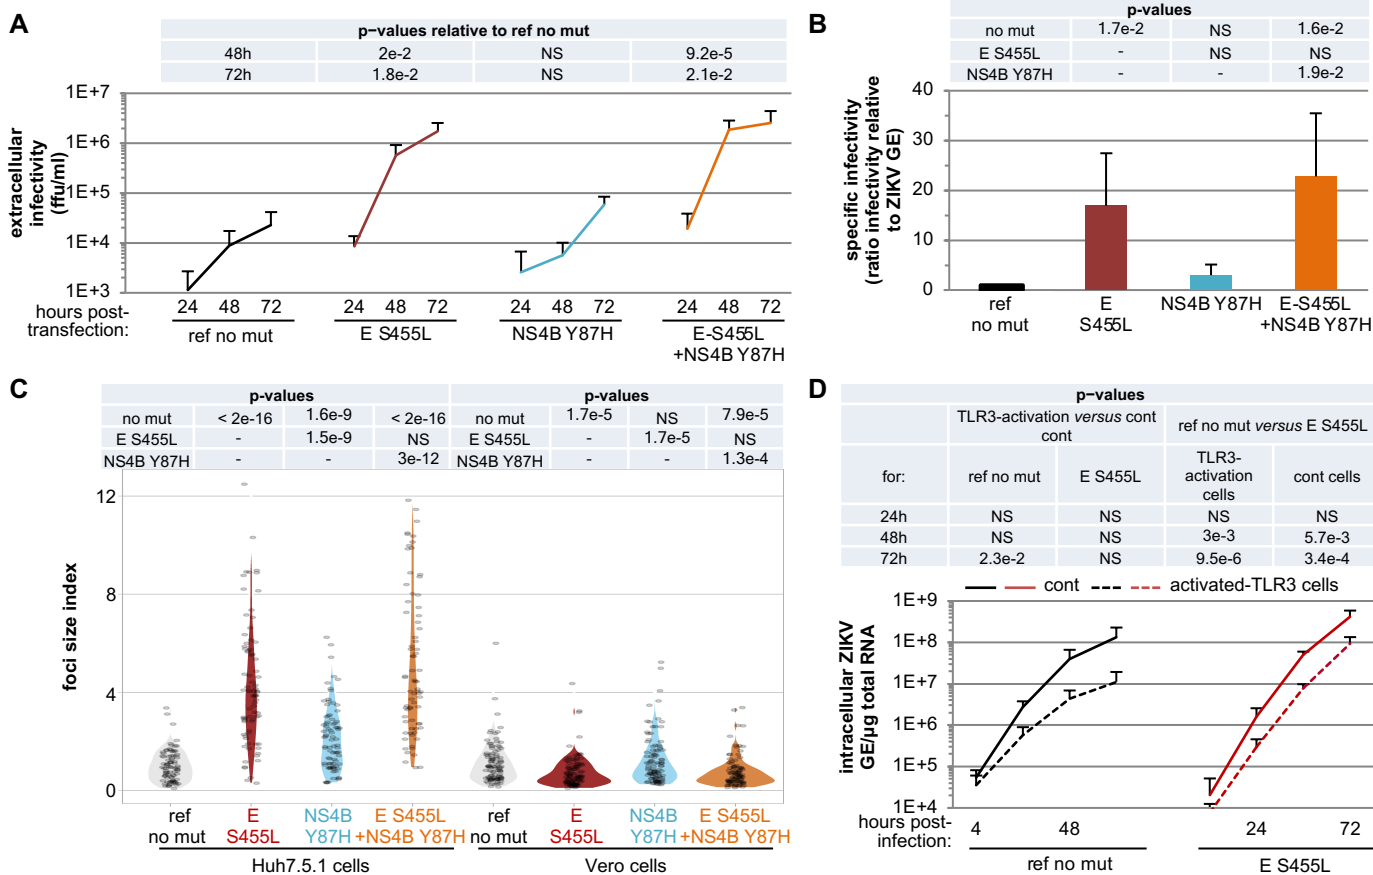

**Figure 3. Introduction of the selected non-synonymous mutations in ZIKV molecular clone.** ZIKV genome bearing the selected mutations (*i.e.*, single S455L mutation in E, Y87H in NS4B and combined E S455L and NS4B Y87H mutations), and as a reference ZIKV genome without the mutation (*i.e.*, ref no mut), were transfected in Huh7.5.1 cells. **A.** Time-course quantification of infectious viral production at the indicated times post-transfection. Results of 4-to-6 independent experiments; mean  $\pm$  SD; p-values as indicated in the table above the graph and relative to the reference (ref no mut). **B.** Quantification of the specific infectivity (as in **Fig. 1A**) in the viral supernatants harvested at 72 hours for ZIKV genome mutants or not. Results are the mean  $\pm$  SD relative to the reference virus set to 1 for each independent experiment; 4-to-6 independent experiments. The p-values indicated in the table correspond to one-by-one comparisons of the condition/mutant displayed below in the graph with conditions/mutants indicated on the left side of the table. **C.** Analysis of the focus size index of the indicated mutated or reference ZIKV determined in Huh7.5.1 and Vero cells, as indicated, for supernatants harvested at 72 hours post-transfection. The quantifications are displayed by violin plots, determined as in **Fig. 1C**. Results of 4 independent experiments; p-values as indicated in the table above the graph. **D.** Time-course analysis of the replication of the E S455L mutant versus reference virus (ref no mut) assessed in activated-TLR3 Huh7.5.1 cells (dotted lines) as compared to control cells (solid lines). Quantification of the intracellular ZIKV genome levels at the indicated times post-infection at MOI 0.005; 4 independent experiments; mean  $\pm$  SD. The statistical comparison of intracellular ZIKV GE levels for the same target cells and between mutant and reference virus is indicated in the table at the top of the graphs with indicated p-values and NS;  $p > 0.05$ .

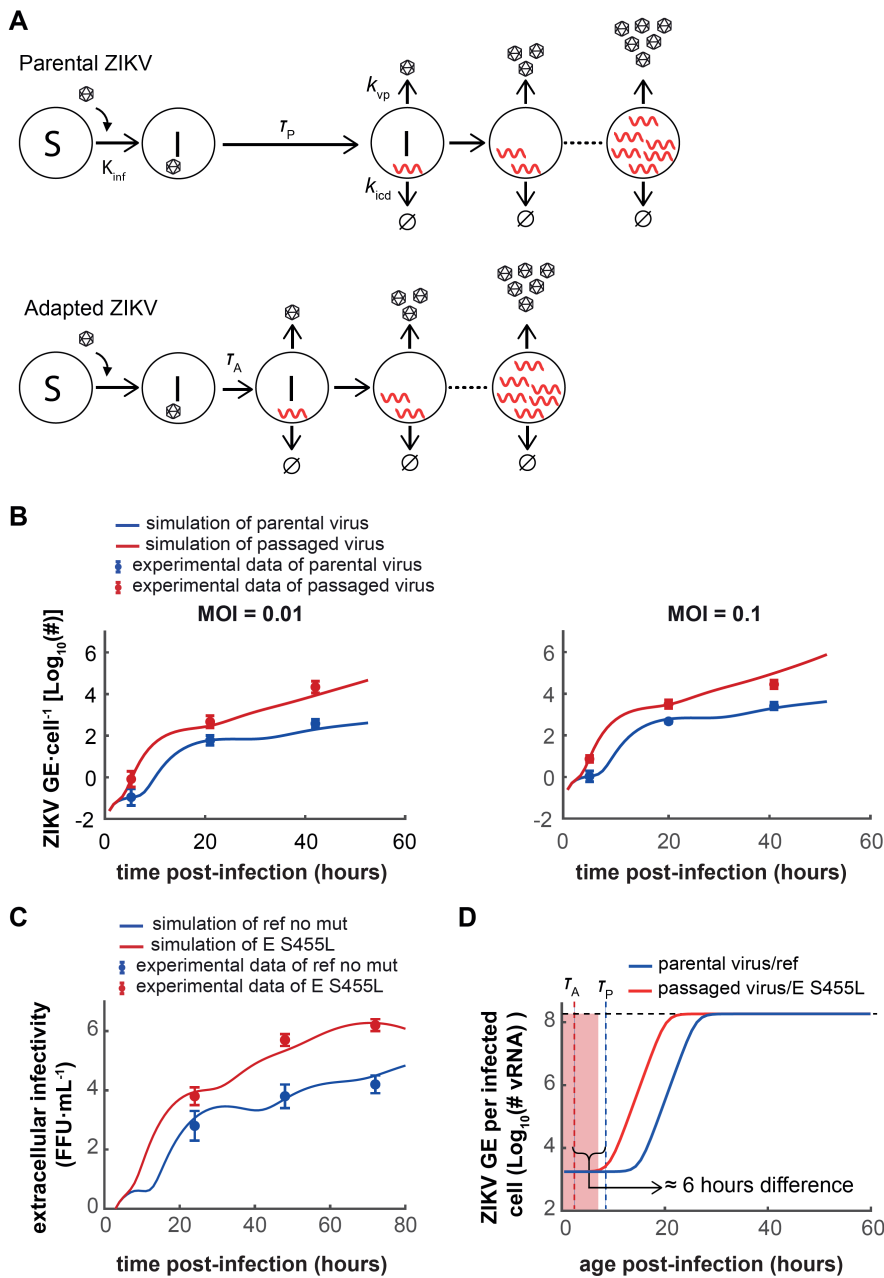

**Figure 4. Multiscale model of ZIKV infection and replication.** **A.** Schematic representation of the model. ZIKV infect susceptible cells with rate  $k_{\text{inf}}$ . Productive viral replication begins with a time delay  $\tau_P$  for the parental virus and  $\tau_A$  for the evolved or mutated viruses. Virus replication within infected cells is modeled as logistic growth (**Appendix 1**, mathematical model). Infected cells produce virions with rate  $k_{\text{vp}}$ , and die with rate  $k_{\text{icd}}$ . **B.** Model simulation with optimized parameters *versus* experimental measurements of the number of ZIKV genomes per cell upon infection with different doses of parental and adapted ZIKV. **C.** Model simulation *versus* experimental measurements of the number of foci-forming units (ffu) per ml of supernatant upon transfection with parental and the E S455L mutant ZIKV. **D.** Simulation of the ZIKV replication inside the infected cells for parental/ref and adapted/E S455L mutant. The shaded region is the 95% CI for the estimated  $\tau_A$  value.
